# Supplementary material for: Metal–organic framework derived 3D graphene decorated NaTi2(PO4)3 for fast Na-ion storage
Source: Royal Society of Chemistry journal article supplement (doi:10.1039/c9nr00610a), 2019-01-01
Supplement: c9nr00610a3.pdf [file c9nr00610a3.pdf]

## Supplementary Information

### Metal-Organic Framework Derived 3D Graphene Decorated NaTi<sub>2</sub>(PO<sub>4</sub>)<sub>3</sub> for Fast Na-ion Storage

***Lei Wang <sup>a,b</sup>, Zhennan Huang <sup>b</sup>, Bo Wang <sup>a,\*</sup>, Hao Luo <sup>a</sup>, Meng Cheng <sup>b</sup>, Yifei Yuan <sup>b</sup>, Kun He <sup>b</sup>, Tara Foroozan <sup>b</sup>, Ramasubramonian Deivanayagam <sup>b</sup>, Guijing Liu <sup>c</sup>, Dianlong Wang <sup>a,\*</sup>, and Reza Shahbazian-Yassar <sup>b,\*</sup>***

*<sup>a</sup> MIIT Key Laboratory of Critical Materials Technology for New Energy Conversion and Storage, School of Chemistry and Chemical Engineering, Harbin Institute of Technology, 150001 Harbin, China.*

*<sup>b</sup> Department of Mechanical and Industrial Engineering, University of Illinois at Chicago (UIC), Chicago, IL 60607, USA*

*<sup>c</sup> School of Chemistry and Materials Science, Ludong University, Yantai, 264025, P R China*

*\* Corresponding author. Fax: +86 45186413721; Tel: +86 45186413751.*

*E-mail address:*

[wangbo19880804@163.com](mailto:wangbo19880804@163.com) (B. Wang),

[wangdianlonghit@163.com](mailto:wangdianlonghit@163.com) (D. L. Wang),

[rsyassar@uic.edu](mailto:rsyassar@uic.edu) (R. S. Yassar).

**Calculation Methods:** The specific capacity of electrode materials was calculated from galvanostatic charge-discharge (GCD) tests according to the equations S1, where SC is the specific capacity,  $I$  is the discharge current,  $\Delta t$  is the discharge time, and  $m$  is the mass loading of active materials (for example, the mass of NTP-rGO composites includes the mass of NTP and rGO), respectively.

$$SC = \frac{I\Delta t}{m} \quad (S1)$$

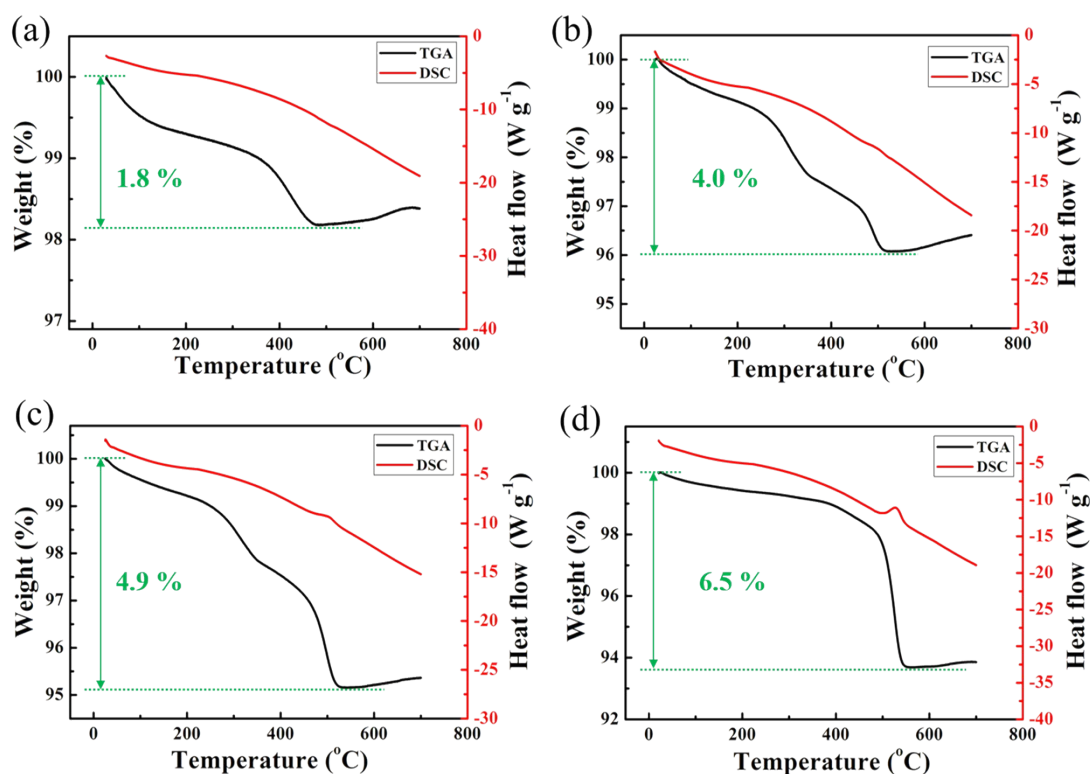

Fig. S1† TGA/DSC curves of all samples (a) NTP, (b) NTP-rGO-10, (c) NTP-rGO and (d) NTP-rGO-30.

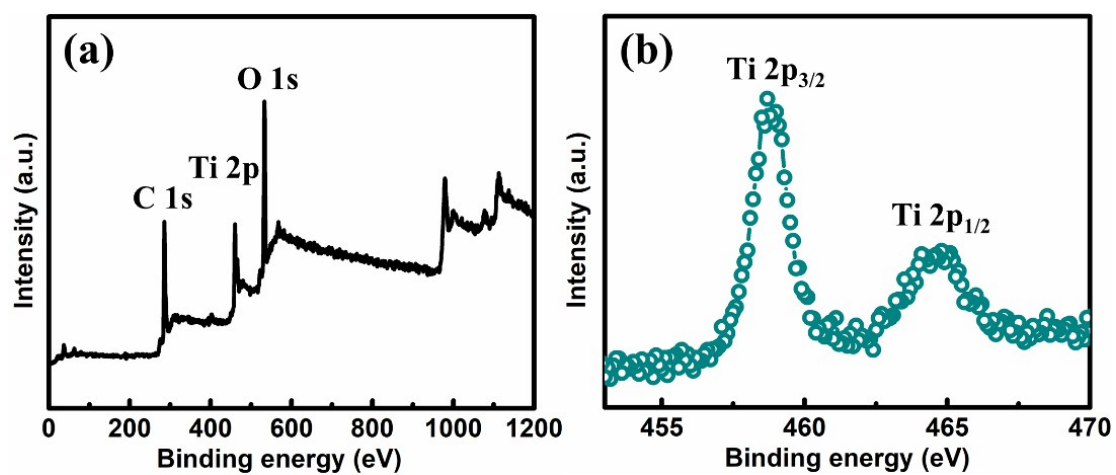

Fig. S2† XPS survey spectrum of MIL-125 and the corresponding high-resolution Ti 2p XPS spectrum.

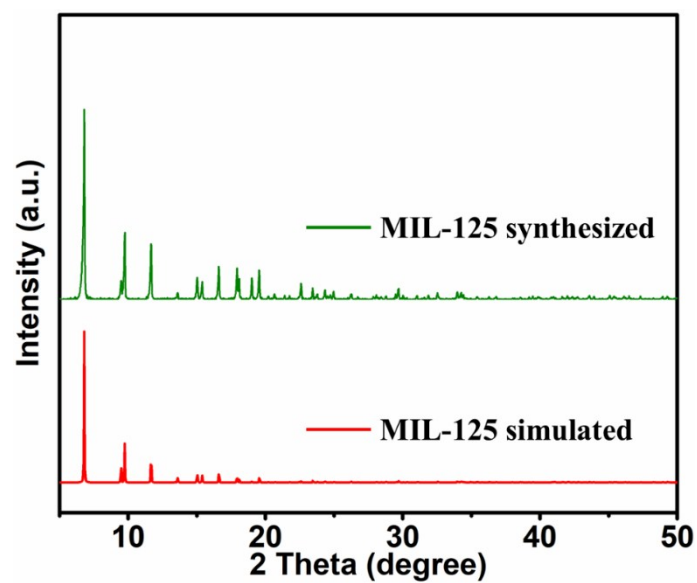

Fig. S3† XRD pattern of MIL-125 compared with the MIL-125 simulated.

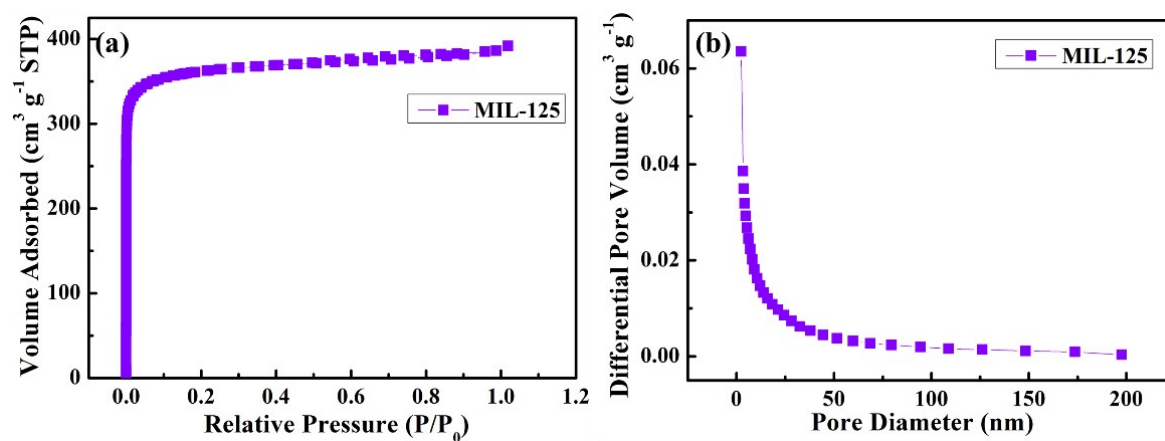

**Fig. S4†** (a) Nitrogen adsorption-desorption isotherms of MIL-125; (b) The pore size distribution plot of MIL-125

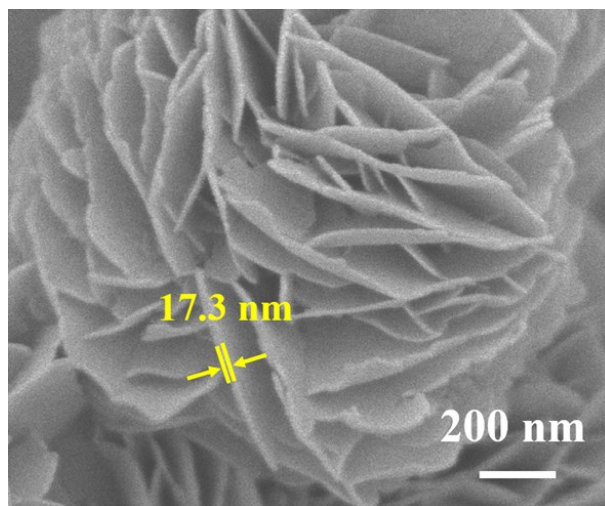

**Fig. S5†** SEM image of the NTP precursor.

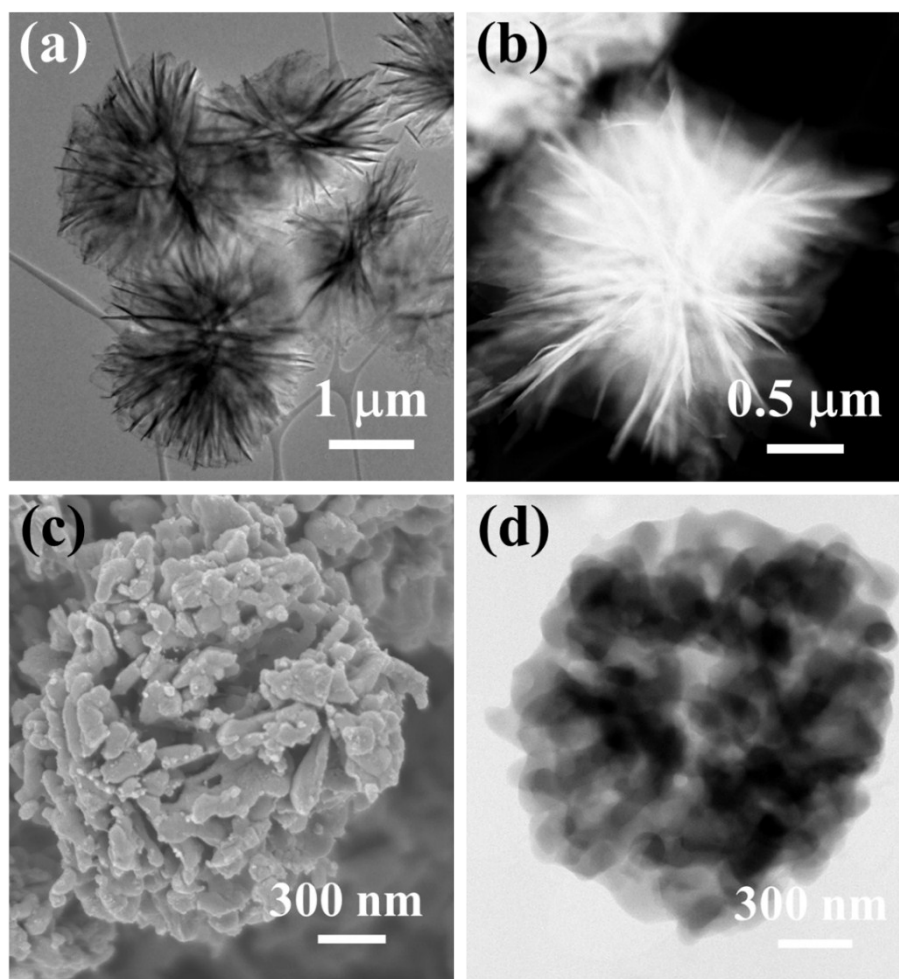

**Fig. S6†** TEM images of (a) NTP precursor and (b) NTP-rGO precursor; (c) SEM image of NTP; (d) TEM image of NTP sample.

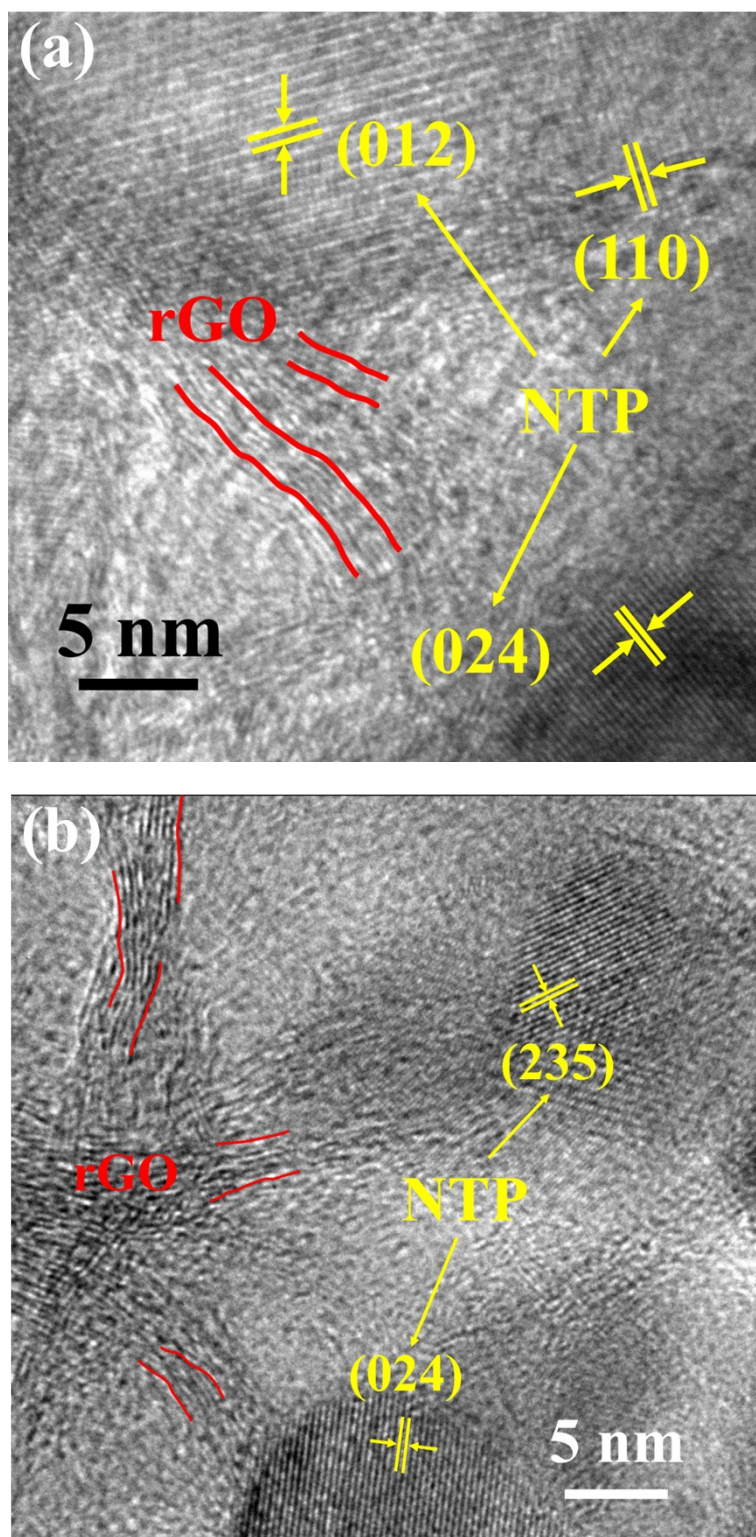

Fig. S7† HRTEM image of the NTP-rGO.



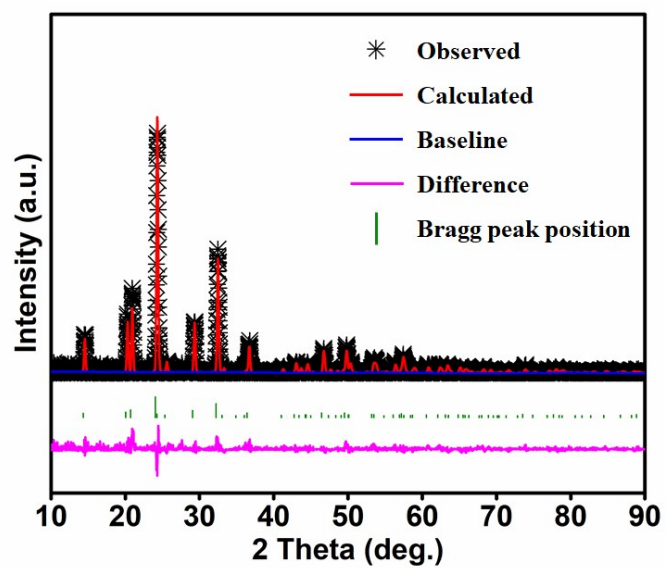

**Fig. S8†** XRD pattern of the NTP-rGO and its Rietveld refinement.

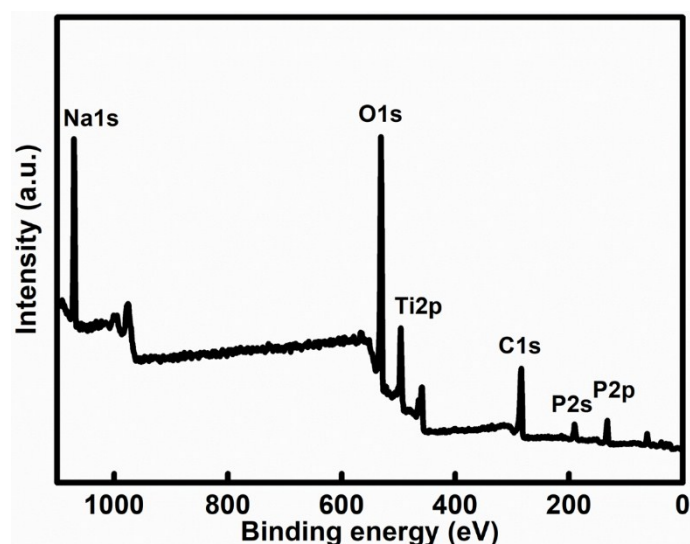

Fig. S9† XPS survey spectrum of the NTP-rGO.

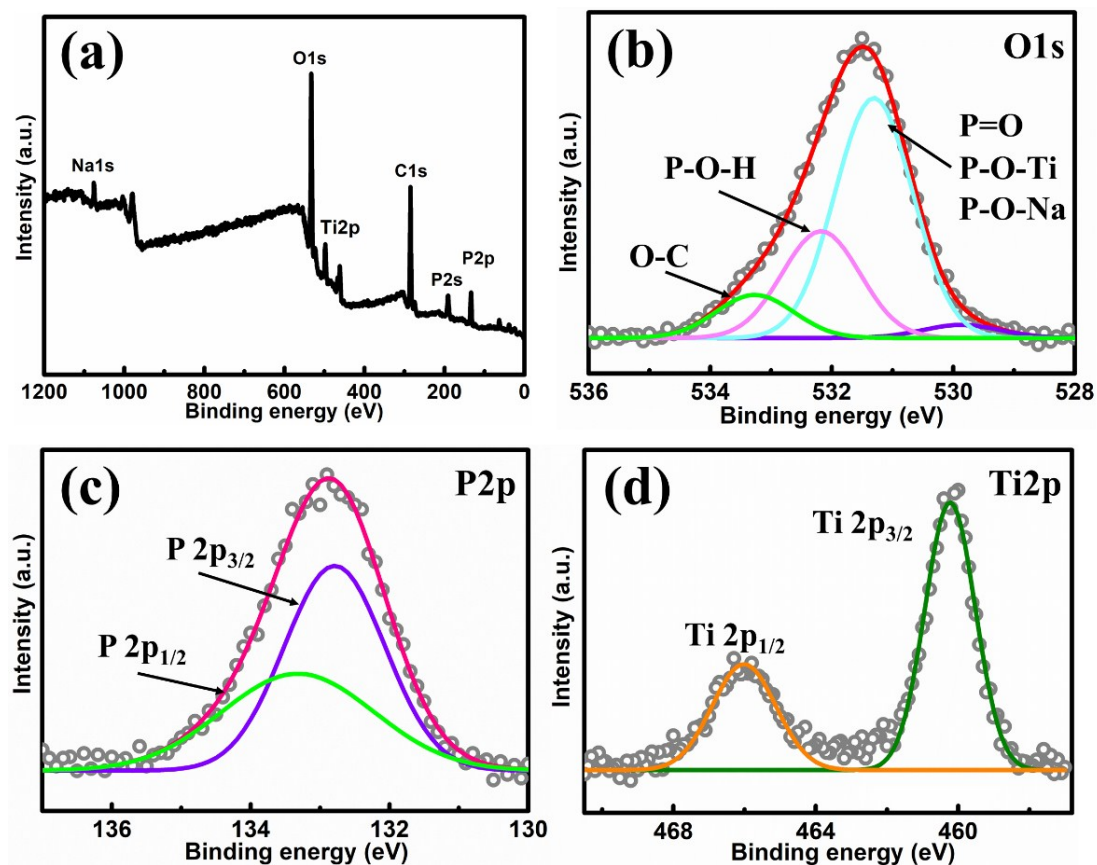

**Fig. S10†** (a) XPS survey spectrum of the NTP and high-resolution spectra for (b) O 1s, (c) P 2p and (d) Ti 2p, respectively.

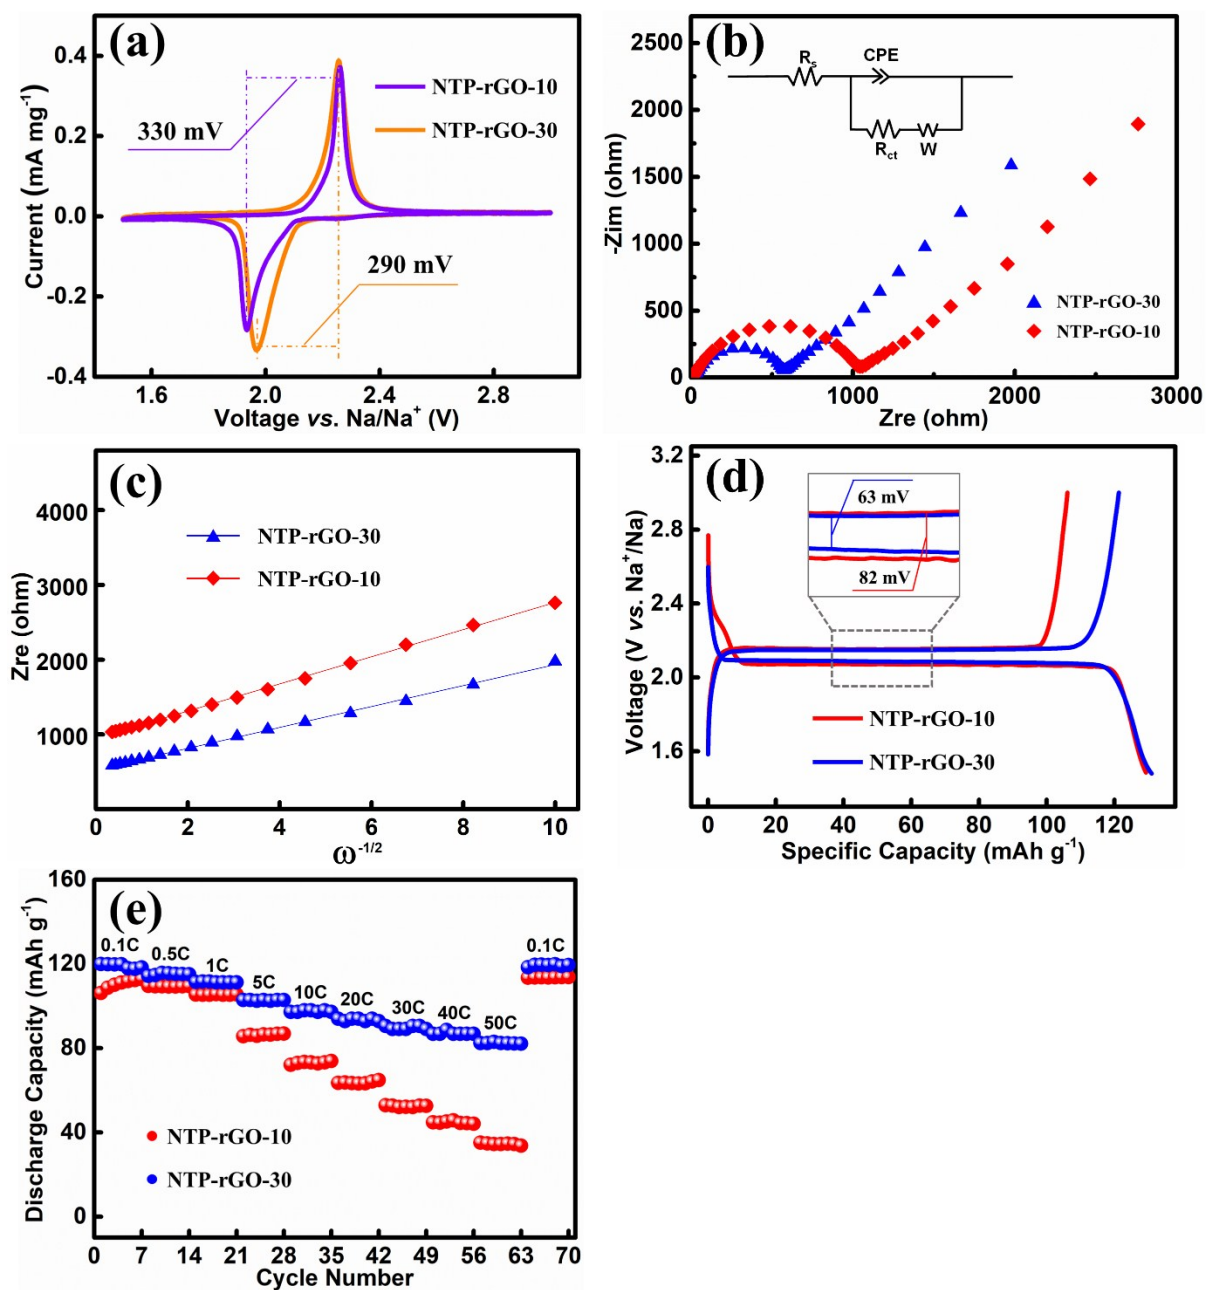

**Fig. S11†** The electrochemical performance of NTP-rGO-10 and NTP-rGO-30. (a) CV curves. (b) Nyquist plots and the equivalent circuit (the inset). (c) The relationship between  $Z_{re}$  and  $\omega^{-1/2}$  at low frequency from EIS test. (d) The first cycle of the discharge-charge curves. (e) Rate performance.

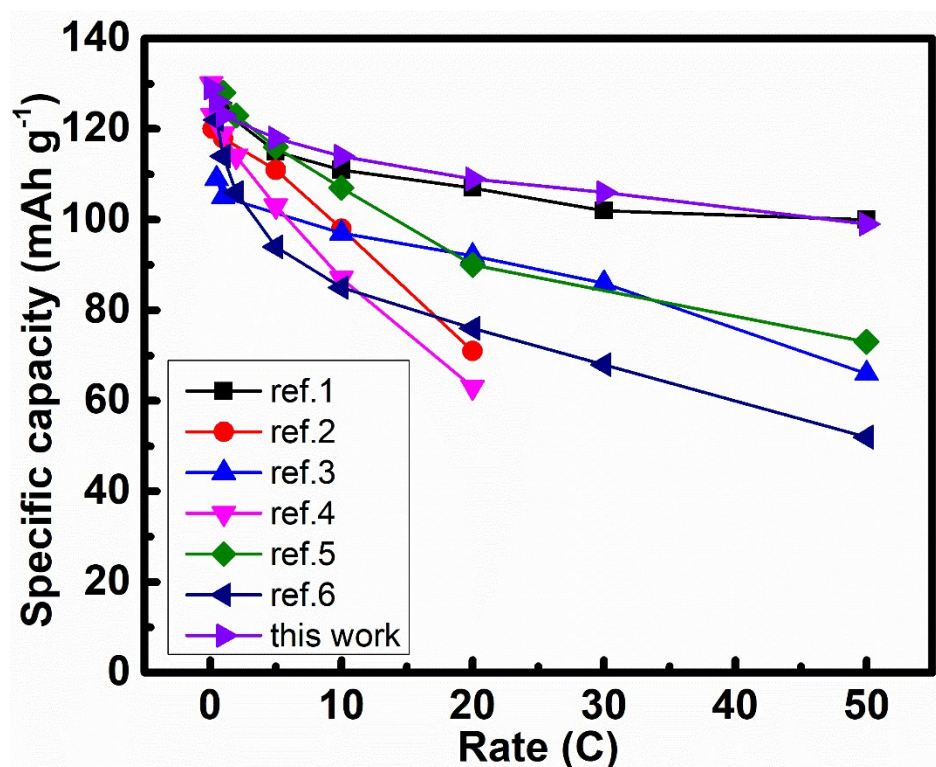

**Fig. S12†** The comparison of specific capacity and rate capability of NTP-rGO in this work with others published recently. <sup>[1-6]</sup>

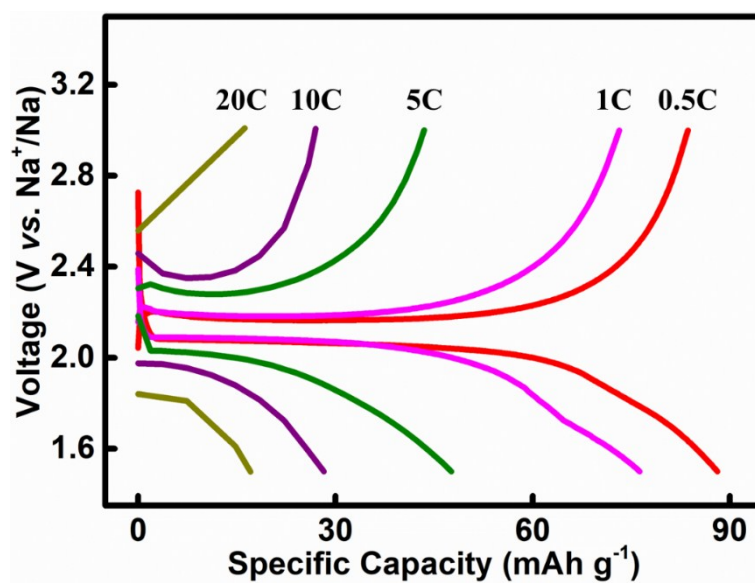

Fig. S13† The discharge-charge curves of NTP electrode at various current densities.

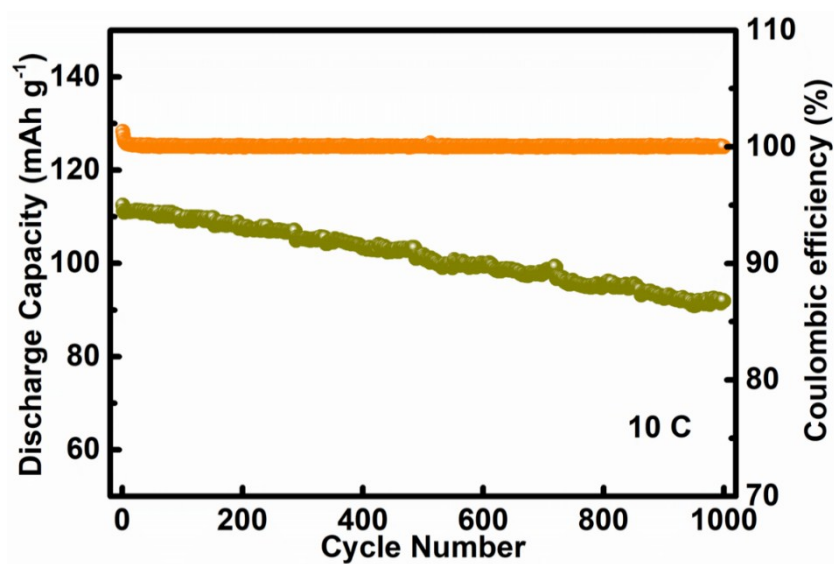

Fig. S14† Cycling stability test at 10 C for NTP-rGO electrode.

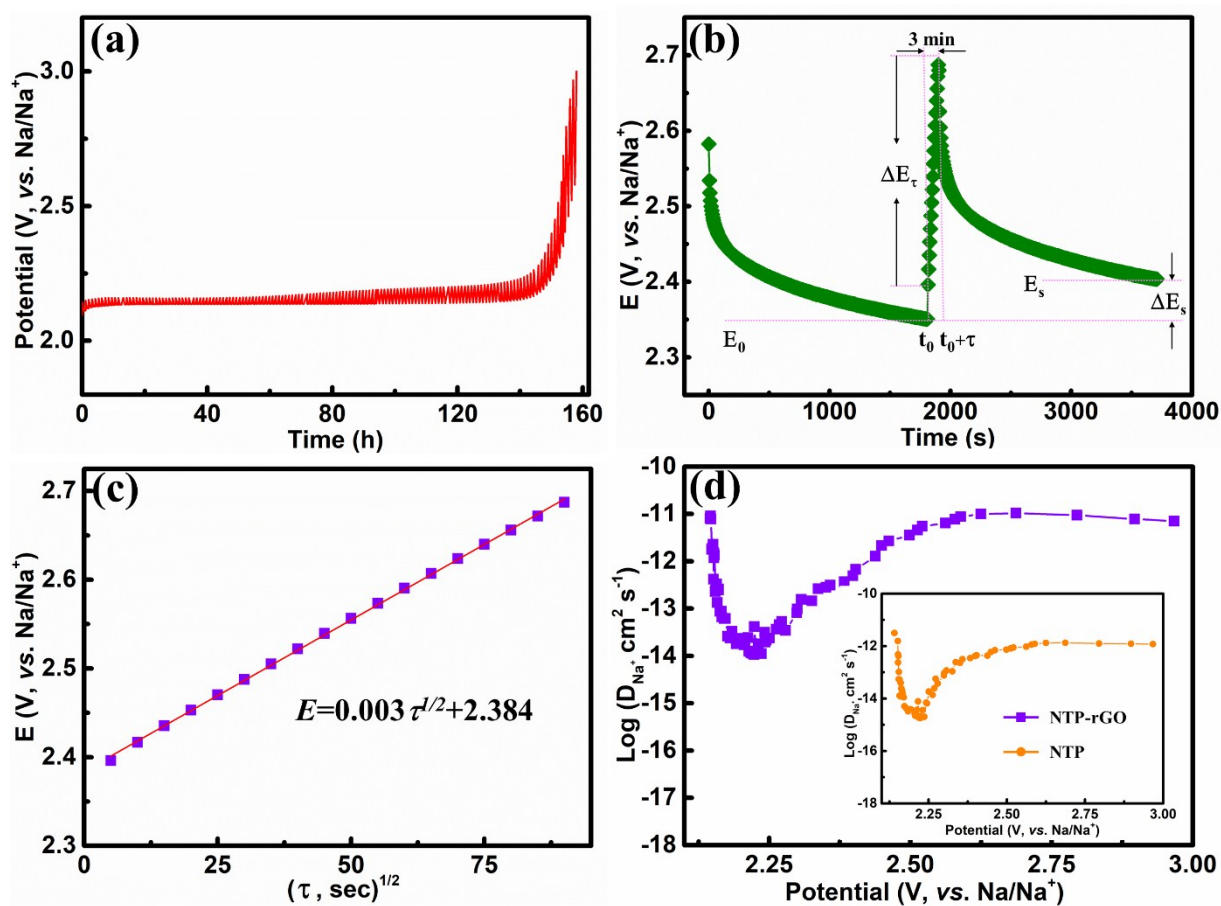

**Fig. S15†** (a) The charge GITT curves of NTP-rGO. (b)  $t$  vs.  $E$  profile for a single GITT titration. (c) Linear behavior of  $E$  vs.  $\tau^{1/2}$  relationship. (d) The calculated  $D_{\text{Na}^+}$  from GITT data for the NTP-rGO electrode and the NTP electrode (the inset).



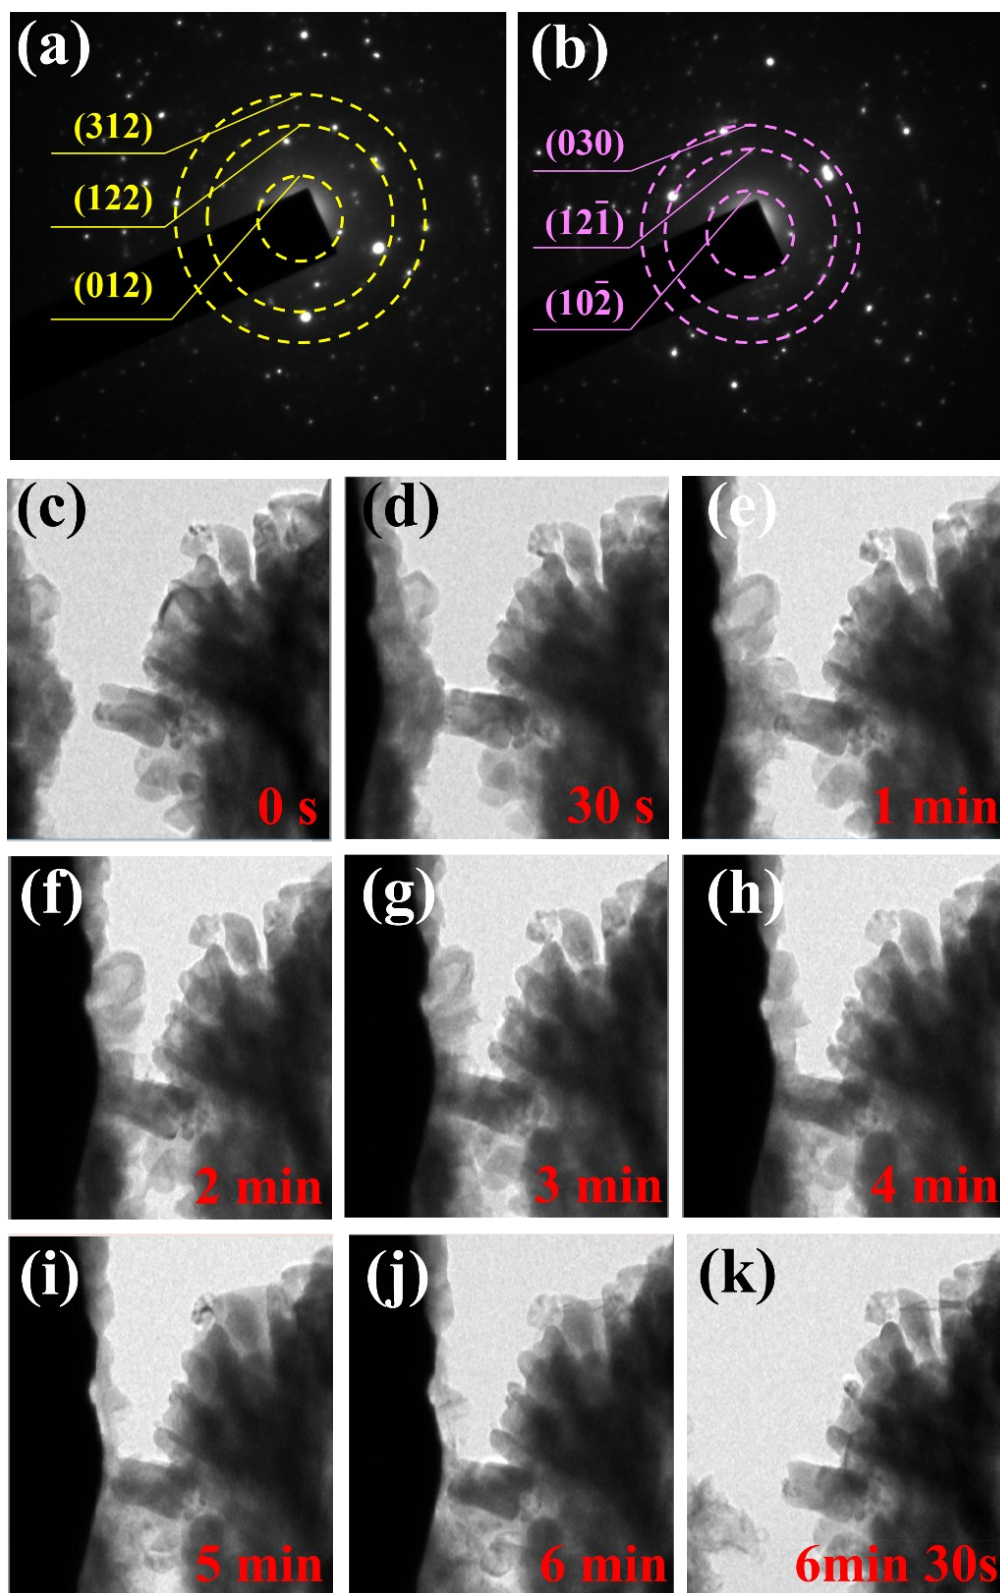

**Fig. S16†** SAED pattern of the NTP a) before sodiation and b) after sodiation. c-k) *In-situ* TEM of the NTP during the sodiation/desodiation process.



**Table S1** The comparison of CE of NTP-rGO in this work with recent published works.

| Materials              | Current density (C) | Coulombic efficiency (%) | Ref. |
|------------------------|---------------------|--------------------------|------|
| This work              | 0.1 C               | 96.8%                    | -    |
| NTP $\subset$ GN       | 1 C                 | 79%                      | [7]  |
| NTP@C@PC               | 1 C                 | 95%                      | [8]  |
| NTP-NBA                | 1 C                 | 83%                      | [9]  |
| NTP $\subset$ rGO-CNTs | 1 C                 | 90%                      | [5]  |
| NTP/C P2               | 0.1 C               | 95%                      | [10] |
| h-MNTP/WMCNTs          | 0.5 C               | 96.6%                    | [11] |

## Reference

1. C. Xu, Y. Xu, C. Tang, Q. Wei, J. Meng, L. Huang, L. Zhou, G. Zhang, L. He and L. Mai, *Nano Energy*, 2016, 28, 224-231.
2. P. Wei, Y. Liu, Z. Wang, Y. Huang, Y. Jin, Y. Liu, S. Sun, Y. Qiu, J. Peng, Y. Xu, X. Sun, C. Fang, J. Han and Y. Huang, *ACS Appl. Mater. Inter.*, 2018, 10, 27039-27046.
3. L. Fu, X. Xue, Y. Tang, D. Sun, H. Xie and H. Wang, *Electrochim. Acta*, 2018, 289, 21-28.
4. M. Li, L. Liu, P. Wang, J. Li, Q. Leng and G. Cao, *Electrochim. Acta*, 2017, 252, 523-531.
5. G. Xu, Z. Li, X. Wei, L. Yang and P. K. Chu, *Electrochim. Acta*, 2017, 254, 328-336.
6. L. Xu, G. Xu, Z. Chen, X. Wei, J. Cao and L. Yang, *J. Mater. Sci.: Materials in Electronics*, 2018, 29, 9258-9267.
7. C. Wu, P. Kopold, Y. Ding, P. Aken, J. Maier, Y. Yu, *ACS Nano*, 2015, 9, 6610.
8. Y. Jiang, L. Zeng, J. Wang, W. Li, F. Pan and Y. Yu, *Nanoscale*, 2015, 7, 14723-14729.
9. G. Yang, H. Song, M. Wu and C. Wang, *J. Mater. Chem. A*, 2015, 3, 18718-18726.
10. Z. Huang, L. Liu, L. Yi, W. Xiao, M. Li, Q. Zhou, G. Guo, X. Chen, H. Shu, X. Yang and X. Wang, *J. Power Sources*, 2016, 325, 474-481.
11. G. B. Xu, L. W. Yang, X. L. Wei, J. W. Ding, J. X. Zhong and P. K. Chu, *J. Power Sources*, 2016, 327, 580-590.
